# Supplementary material
Source: Research Square preprint supplement (doi:10.21203/rs.3.rs-9800622/v1)
Supplement: Supplementary file 1 [file 022943f25e6e99bfbe1cffa9.doc]

**Title: Break in Neurons**

| >NGF  atgtccatgttgttctacactctgatcacagcttttctgatcggcatacaggcggaacca cactcagagagcaatgtccctgcaggacacaccatcccccaagcccactggactaaactt cagcattcccttgacactgcccttcgcagagcccgcagcgccccggcagcggcgatagct gcacgcgtggcggggcagacccgcaacattactgtggaccccaggctgtttaaaaagcgg cgactccgttcaccccgtgtgctgtttagcacccagcctccccgtgaagctgcagacact caggatctggacttcgaggtcggtggtgctgcccccttcaacaggactcacaggagcaag cggtcatcatcccatcccatcttccacaggggcgaattctcggtgtgtgacagtgtcagc gtgtgggttggggataagaccaccgccacagacatcaagggcaaggaggtgatggtgttg ggagaggtgaacattaacaacagtgtattcaaacagtacttttttgagaccaagtgccgg gacccaaatcccgttgacagcgggtgccggggcattgactcaaagcactggaactcatat tgtaccacgactcacacctttgtcaaggcgctgaccatggatggcaagcaggctgcctgg cggtttatccggatagatacggcctgtgtgtgtgtgctcagcaggaaggctgtgagaaga gcctga   1. **Nucleotide**     >NGF  MSMLFYTLITAFLIGIQAEPHSESNVPAGHTIPQAHWTKLQHSLDTALRRARSAPAAAIA ARVAGQTRNITVDPRLFKKRRLRSPRVLFSTQPPREAADTQDLDFEVGGAAPFNRTHRSK RSSSHPIFHRGEFSVCDSVSVWVGDKTTATDIKGKEVMVLGEVNINNSVFKQYFFETKCR DPNPVDSGCRGIDSKHWNSYCTTTHTFVKALTMDGKQAAWRFIRIDTACVCVLSRKAVRR A   1. **Peptide** |
| --- |

**Primary sequence of NGF gene**

**Table 1**

| **Organisms** | **HMMER** | **BLAST2** | **BLAST2GO** |
| --- | --- | --- | --- |
| *Homo sapiens* | 28 | 27 | 8 |
| *Mus musculus* | 21 | 18 | 3 |
| **Total** | **49** | **45** | **11** |

**Summary of the (a) NGF domain (b) Homolog’s, and (c) NGF**

**Table 2**

| **Gene Id** | **Gene** | **Protein** |
| --- | --- | --- |
| ENSP00000505558.1 | NGF | nerve growth factor |
| ENSP00000506569.1 | NGF | nerve growth factor |
| ENSP00000506492.1 | NGF | nerve growth factor |
| ENSP00000502831.1 | NGF | nerve growth factor |
| ENSP00000505694.1 | NGF | nerve growth factor |
| ENSP00000358525.2 | NGF | nerve growth factor |
| ENSP00000502380.1 | NGF | nerve growth factor |
| ENSP00000506364.1 | NGF | nerve growth factor |
| ENSP00000328738.6 | NTF3 | neurotrophin 3 |
| ENSP00000397297.2 | NTF3 | neurotrophin 3 |
| ENSP00000432035.1 | BDNF | brain derived neurotrophic factor |
| ENSP00000379302.3 | BDNF | brain derived neurotrophic factor |
| ENSP00000379305.3 | BDNF | brain derived neurotrophic factor |
| ENSP00000435805.1 | BDNF | brain derived neurotrophic factor |
| ENSP00000379307.3 | BDNF | brain derived neurotrophic factor |
| ENSP00000435564.1 | BDNF | brain derived neurotrophic factor |
| ENSP00000432376.1 | BDNF | brain derived neurotrophic factor |
| ENSP00000400502.1 | BDNF | brain derived neurotrophic factor |
| ENSP00000349084.4 | BDNF | brain derived neurotrophic factor |
| ENSP00000432727.1 | BDNF | brain derived neurotrophic factor |
| ENSP00000437138.1 | BDNF | brain derived neurotrophic factor |
| ENSP00000389345.2 | BDNF | brain derived neurotrophic factor |
| ENSP00000320002.6 | BDNF | brain derived neurotrophic factor |
| ENSP00000379309.2 | BDNF | brain derived neurotrophic factor |
| ENSP00000414303.1 | BDNF | brain derived neurotrophic factor |
| ENSP00000469455.1 | NTF4 | neurotrophin 4 |
| ENSP00000471508.1 | NTF4 | neurotrophin 4 |

***Homo sapiens***

| **Gene Id** | **Gene** | **Protein** |
| --- | --- | --- |
| ENSMUSP00000040345.3 | NGF | nerve growth factor |
| ENSMUSP00000142801.1 | NGF | nerve growth factor |
| ENSMUSP00000102538.2 | NGF | nerve growth factor |
| ENSMUSP00000052302.7 | NTF3 | neurotrophin 3 |
| ENSMUSP00000107863.2 | NTF3 | neurotrophin 3 |
| ENSMUSP00000144828.1 | NTF3 | neurotrophin 3 |
| ENSMUSP00000106673.2 | BDNF | brain derived neurotrophic factor |
| ENSMUSP00000106672.2 | BDNF | brain derived neurotrophic factor |
| ENSMUSP00000106674.2 | BDNF | brain derived neurotrophic factor |
| ENSMUSP00000135762.1 | BDNF | brain derived neurotrophic factor |
| ENSMUSP00000106679.3 | BDNF | brain derived neurotrophic factor |
| ENSMUSP00000106675.2 | BDNF | brain derived neurotrophic factor |
| ENSMUSP00000106678.2 | BDNF | brain derived neurotrophic factor |
| ENSMUSP00000106676.2 | BDNF | brain derived neurotrophic factor |
| ENSMUSP00000106680.3 | BDNF | brain derived neurotrophic factor |
| ENSMUSP00000057989.5 | BDNF | brain derived neurotrophic factor |
| ENSMUSP00000106671.2 | BDNF | brain derived neurotrophic factor |
| ENSMUSP00000057916.6 | NTF5 | neurotrophin 5 |

***Mus musculus***

**Summary of the Gene Ontology Annotation**

**Table 3**
